# Supplementary material for: Toward a Mobile Platform for Real-world Digital Measurement of Depression: User-Centered Design, Data Quality, and Behavioral and Clinical Modeling
Source: PubMed Central journal article supplement (PMC8386379; doi:10.2196/27589), 2021-08-10
Supplement: mental_v8i8e27589_app4.pdf [file mental_v8i8e27589_app4.pdf]

## Study population characteristics

Table S1 gives additional demographic summaries of the enrollment cohort and minimally sufficient data cohort. Note that depression status is not available for all participants from the enrollment survey cohort because if participants answered earlier parts of the enrollment survey in a way that made them ineligible for the study, they did not move on to answer the PHQ-9 questionnaire.

**Table S1:** Detailed demographics of a) all participants that completed the enrollment survey (n=2,360) and b) all participants that were found eligible, enrolled, and provided a minimum of data (Figure 2), shown here separately for depressed and not depressed participants (based on baseline PHQ-9 survey at enrollment).

|                   |                             | Completed enrollment survey (n=2360) |         | Participants with minimally sufficient data (n=384) |         |                      |         |
|-------------------|-----------------------------|--------------------------------------|---------|-----------------------------------------------------|---------|----------------------|---------|
|                   |                             | Count                                | Percent | Depressed (n=313)                                   |         | Not Depressed (n=71) |         |
|                   |                             |                                      |         | Count                                               | Percent | Count                | Percent |
| Cohort            | Depressed (PHQ-9 $\geq$ 10) | 506                                  | 53.5%   | 313                                                 | 100%    | 0                    | 0%      |
|                   | Not Depressed (PHQ-9 < 10)  | 440                                  | 46.5%   | 0                                                   | 0%      | 71                   | 100%    |
| Age               | 18-29                       | 855                                  | 36.2%   | 123                                                 | 39.3%   | 26                   | 36.6%   |
|                   | 30-39                       | 674                                  | 28.6%   | 90                                                  | 28.8%   | 22                   | 31%     |
|                   | 40-49                       | 429                                  | 18.2%   | 56                                                  | 17.9%   | 14                   | 19.7%   |
|                   | 50-59                       | 284                                  | 12%     | 36                                                  | 11.5%   | 8                    | 11.3%   |
|                   | 60-69                       | 93                                   | 3.9%    | 7                                                   | 2.2%    | 0                    | 0%      |
|                   | 70-79                       | 20                                   | 0.8%    | 1                                                   | 0.3%    | 1                    | 1.4%    |
|                   | Other                       | 5                                    | 0.2%    | 0                                                   | 0%      | 0                    | 0%      |
| Education         | High School                 | 638                                  | 27%     | 93                                                  | 29.7%   | 9                    | 12.7%   |
|                   | Some College                | 987                                  | 41.8%   | 128                                                 | 40.9%   | 29                   | 40.8%   |
|                   | College                     | 577                                  | 24.4%   | 77                                                  | 24.6%   | 23                   | 32.4%   |
|                   | Graduate School             | 158                                  | 6.7%    | 15                                                  | 4.8%    | 10                   | 14.1%   |
| Employment Status | Full-time                   | 738                                  | 31.3%   | 74                                                  | 23.6%   | 32                   | 45.1%   |
|                   | None                        | 938                                  | 39.7%   | 151                                                 | 48.2%   | 16                   | 22.5%   |
|                   | Part-time                   | 408                                  | 17.3%   | 45                                                  | 14.4%   | 14                   | 19.7%   |
|                   | Student                     | 224                                  | 9.5%    | 33                                                  | 10.5%   | 7                    | 9.9%    |

|                     |                                           |      |       |     |       |    |       |
|---------------------|-------------------------------------------|------|-------|-----|-------|----|-------|
|                     | Volunteer                                 | 52   | 2.2%  | 10  | 3.2%  | 2  | 2.8%  |
| Income              | less than \$10,000                        | 1319 | 55.9% | 198 | 63.3% | 26 | 36.6% |
|                     | \$20,000 - \$39,999                       | 627  | 26.6% | 73  | 23.3% | 18 | 25.4% |
|                     | \$40,000 - \$59,999                       | 243  | 10.3% | 24  | 7.7%  | 9  | 12.7% |
|                     | \$60,000 - \$79,999                       | 92   | 3.9%  | 9   | 2.9%  | 8  | 11.3% |
|                     | \$80,000 - \$99,999                       | 31   | 1.3%  | 3   | 1%    | 5  | 7%    |
|                     | More than \$100,000                       | 48   | 2%    | 6   | 1.9%  | 5  | 7%    |
| Relationship Status | Divorced                                  | 344  | 14.6% | 54  | 17.3% | 4  | 5.6%  |
|                     | Married                                   | 660  | 28%   | 80  | 25.6% | 28 | 39.4% |
|                     | Separated                                 | 87   | 3.7%  | 12  | 3.8%  | 2  | 2.8%  |
|                     | Single                                    | 1205 | 51.1% | 158 | 50.5% | 37 | 52.1% |
|                     | Widowed                                   | 64   | 2.7%  | 9   | 2.9%  | 0  | 0%    |
| Race                | American Indian or Alaska Native          | 40   | 1.7%  | 12  | 3.8%  | 1  | 1.4%  |
|                     | Asian                                     | 37   | 1.6%  | 5   | 1.6%  | 4  | 5.6%  |
|                     | Black or African American                 | 272  | 11.5% | 29  | 9.3%  | 12 | 16.9% |
|                     | Native Hawaiian or Other Pacific Islander | 6    | 0.3%  | 2   | 0.6%  | 1  | 1.4%  |
|                     | Other                                     | 94   | 4%    | 14  | 4.5%  | 1  | 1.4%  |
|                     | White                                     | 1911 | 81%   | 251 | 80.2% | 52 | 73.2% |
| Sex At Birth        | Female                                    | 2077 | 88%   | 285 | 91.1% | 51 | 71.8% |
|                     | Male                                      | 283  | 12%   | 28  | 8.9%  | 20 | 28.2% |
