# Supplementary material for: Toward a Mobile Platform for Real-world Digital Measurement of Depression: User-Centered Design, Data Quality, and Behavioral and Clinical Modeling
Source: PubMed Central journal article supplement (PMC8386379; doi:10.2196/27589), 2021-08-10
Supplement: mental_v8i8e27589_app6.pdf [file mental_v8i8e27589_app6.pdf]

## PHQ-9 Figures

Figure S1 shows the histogram of the 3779 PHQ-9 sum scores received from the participants having minimally sufficient data ( $n=384$ ) over the course of the 12 week study. It is apparent that the PHQ-9 scores covered the whole range of possible scores (0-27) and that the distribution was resembling a normal distribution, with somewhat higher than expected values at both the extremes.

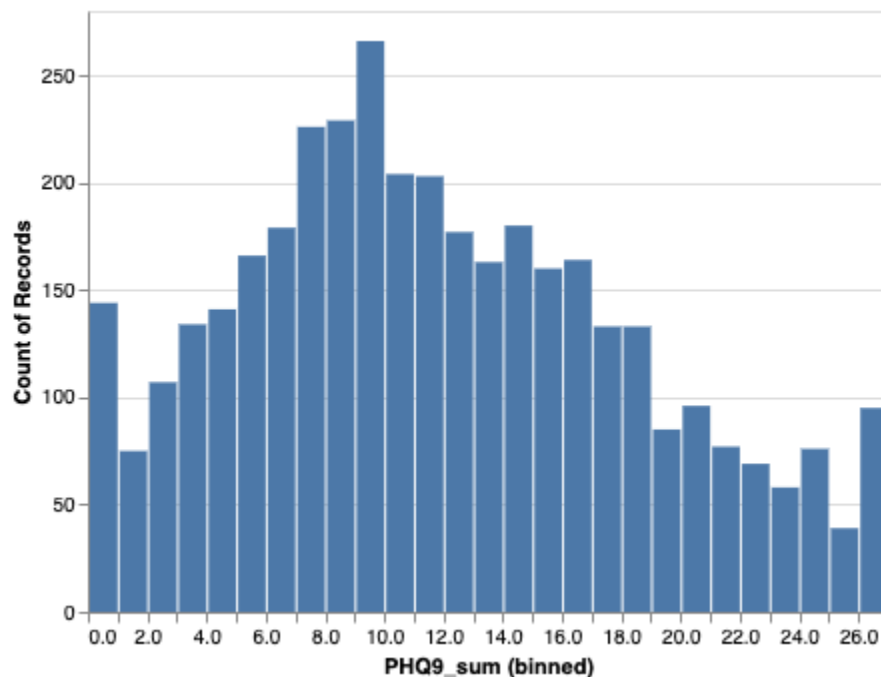

**Figure S1:** Histogram of the 3779 PHQ-9 sum scores received from 384 unique participants over the course of the 12 week study.

Figure S2 shows the association between PHQ-9 score and the 11 behavioral features that showed a significant ( $P \leq 0.001$ , adjusted by Benjamini-Hochberg procedure) Spearman's rho correlation with the PHQ-9 score.

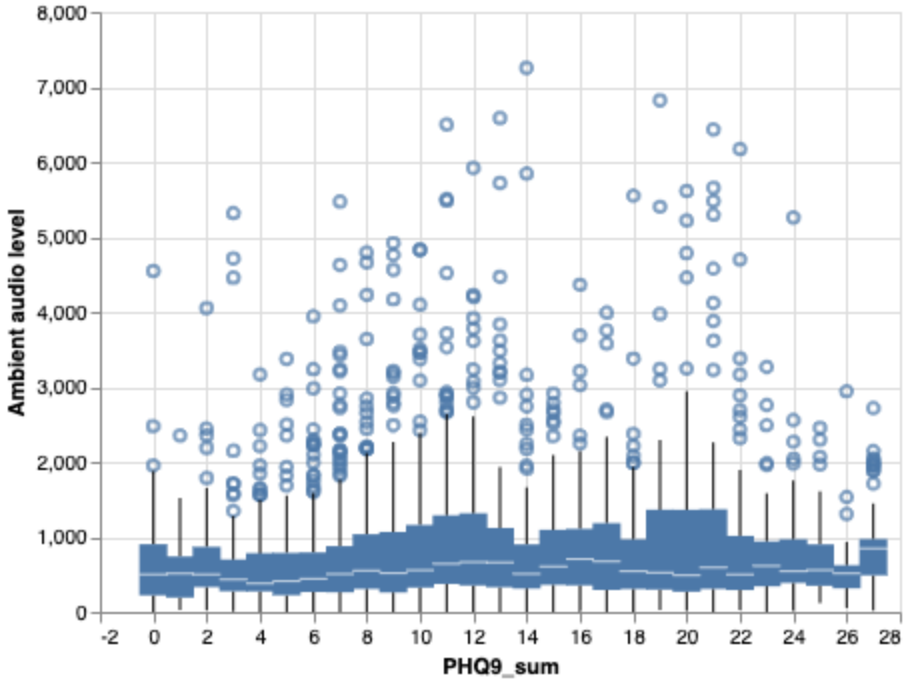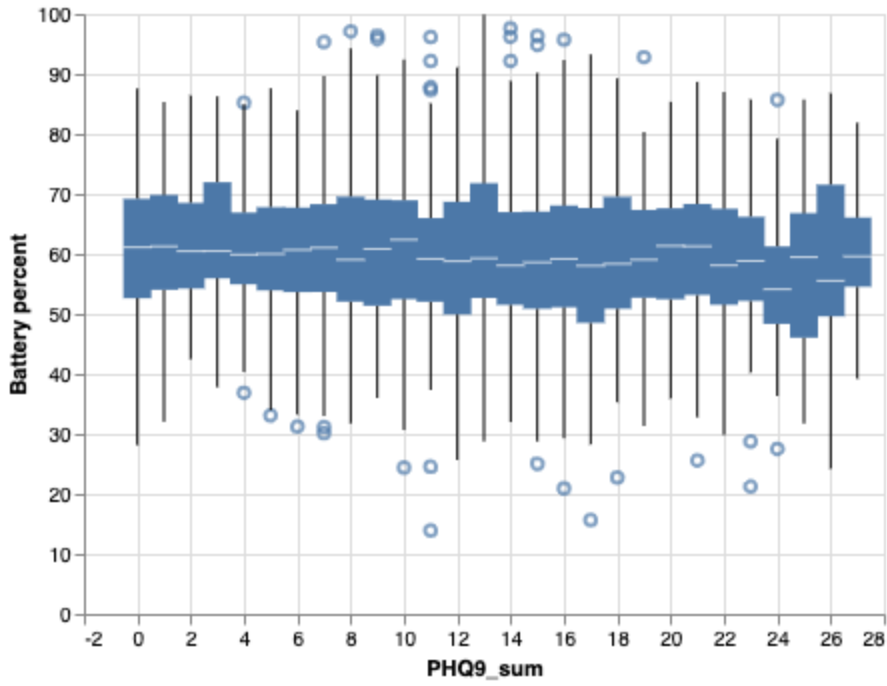

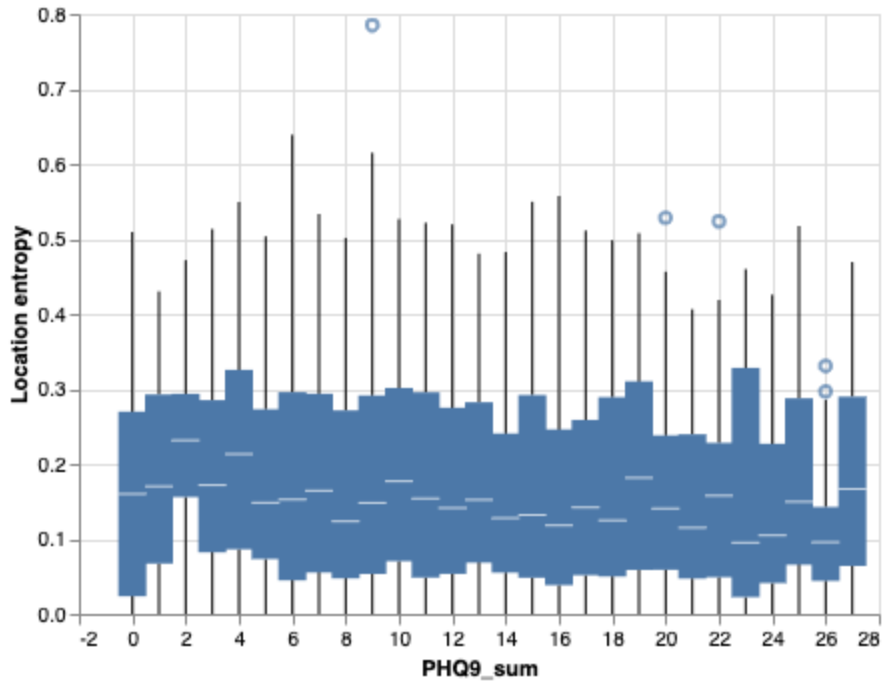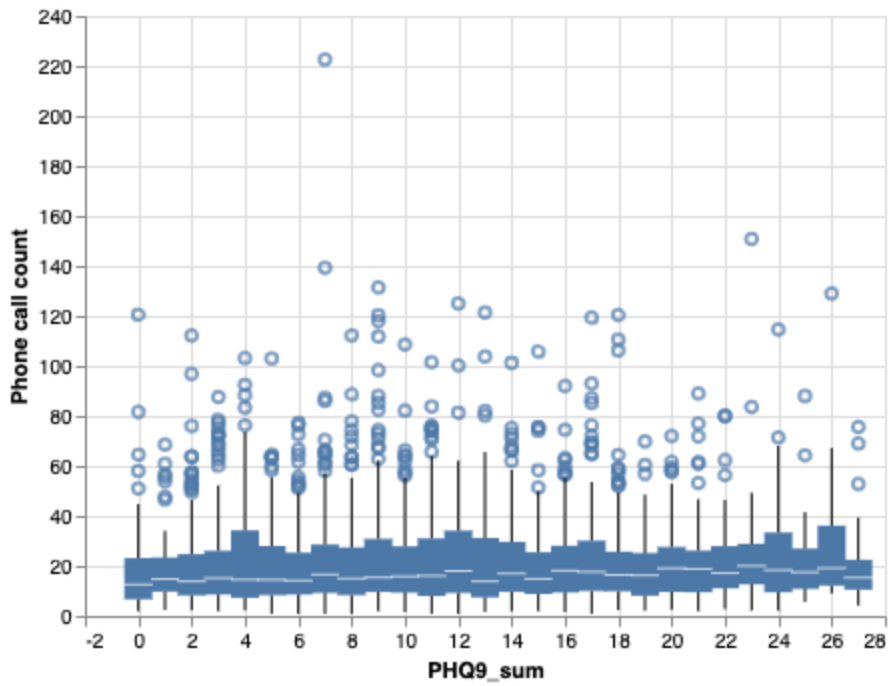

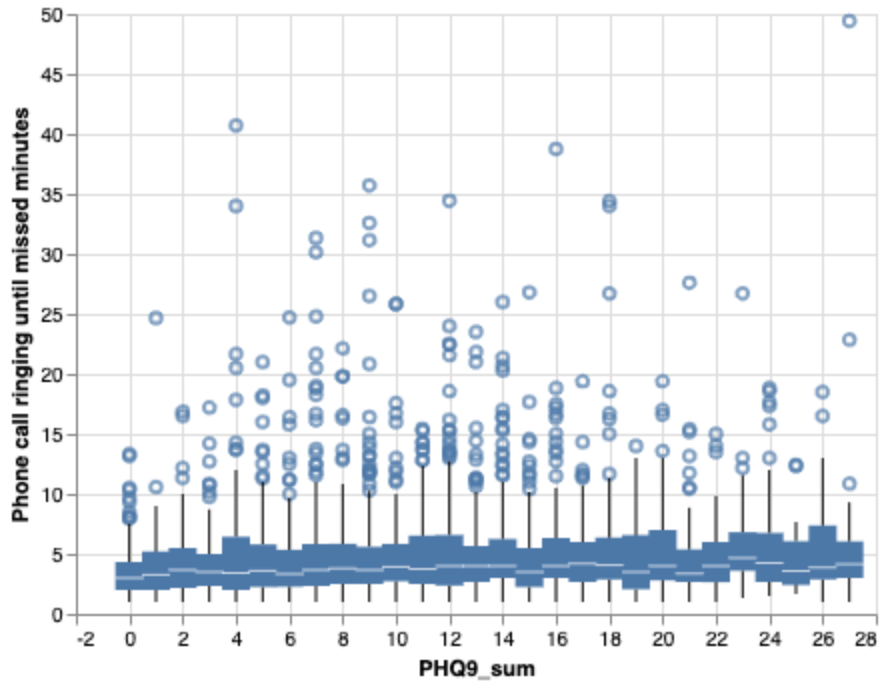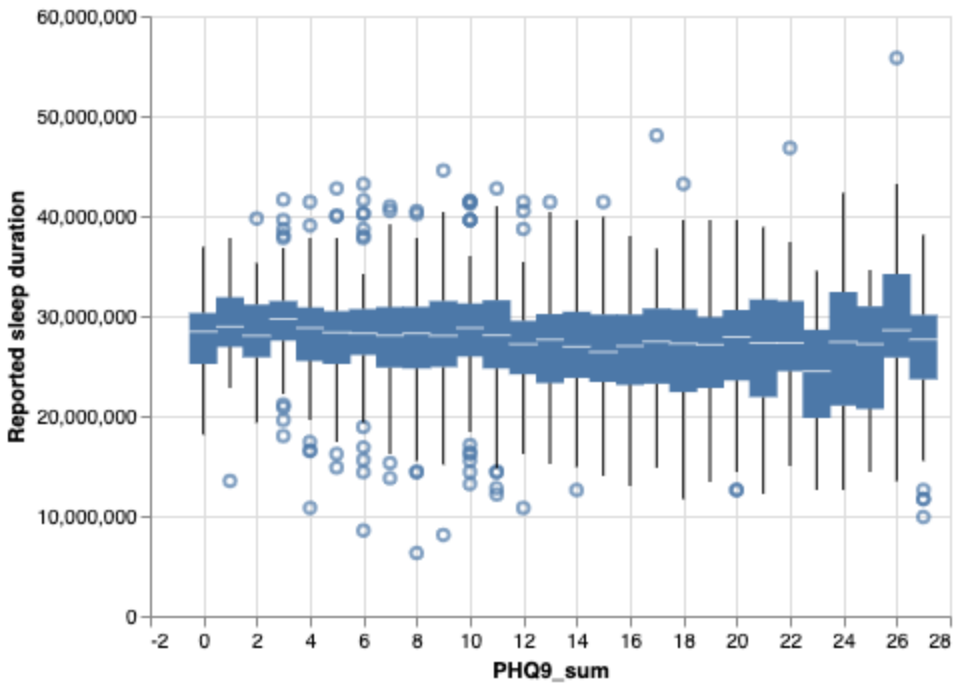

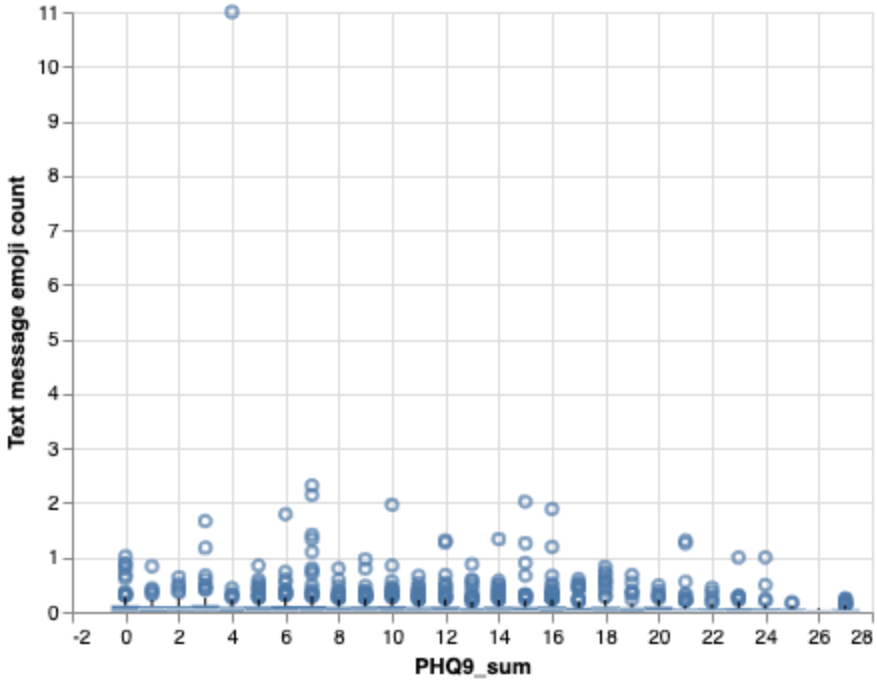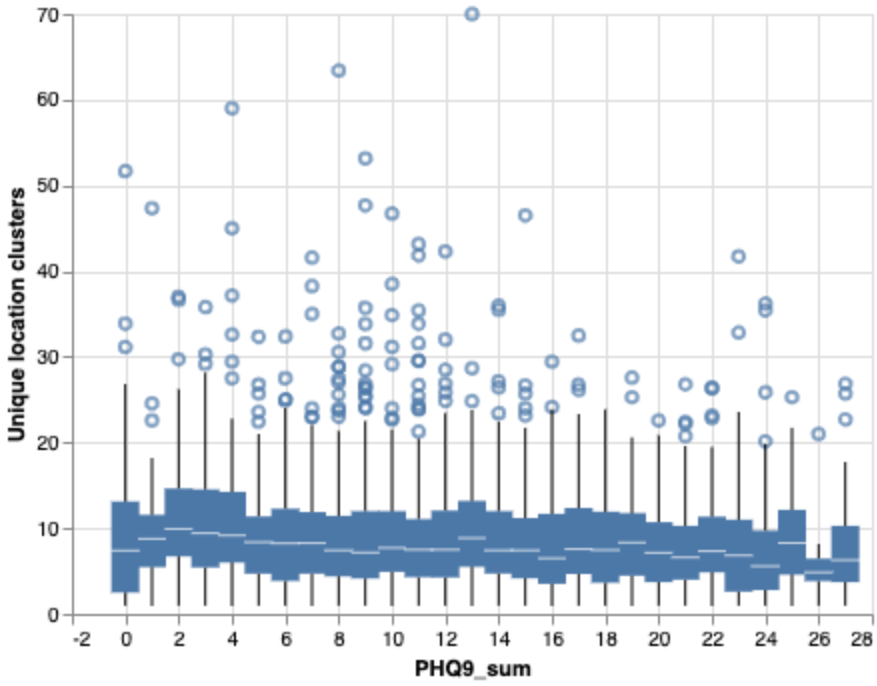

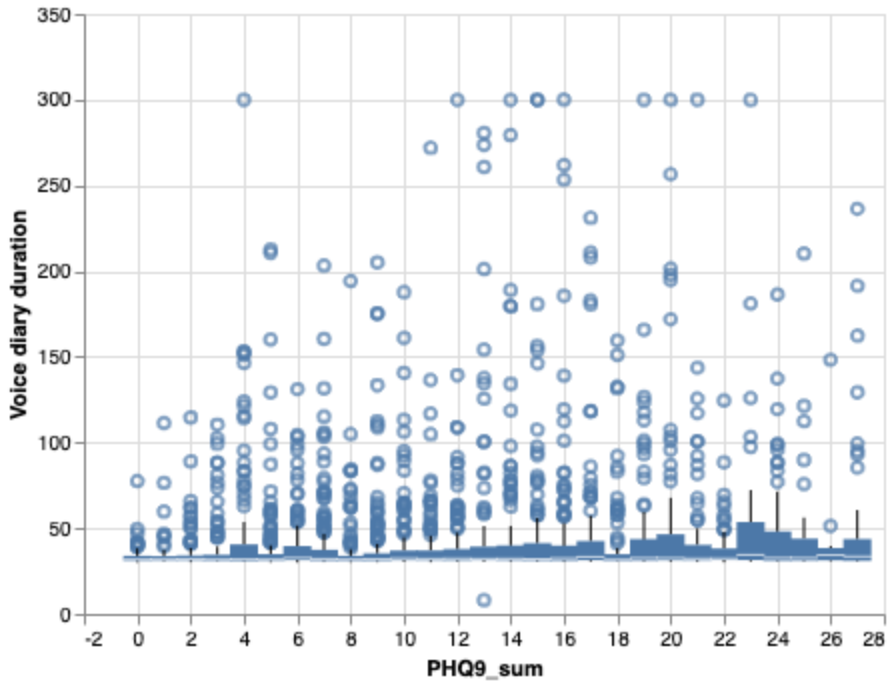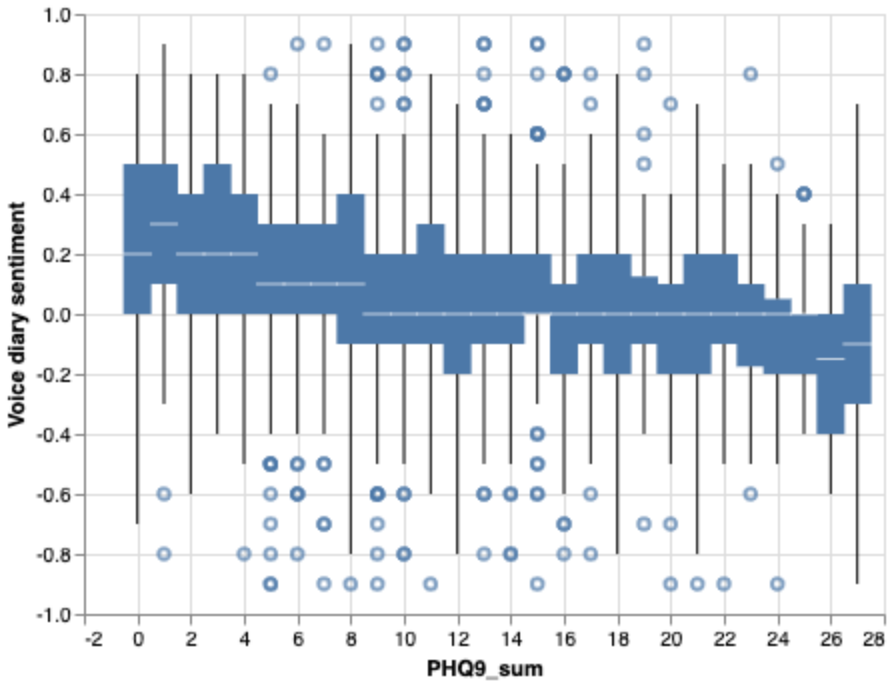

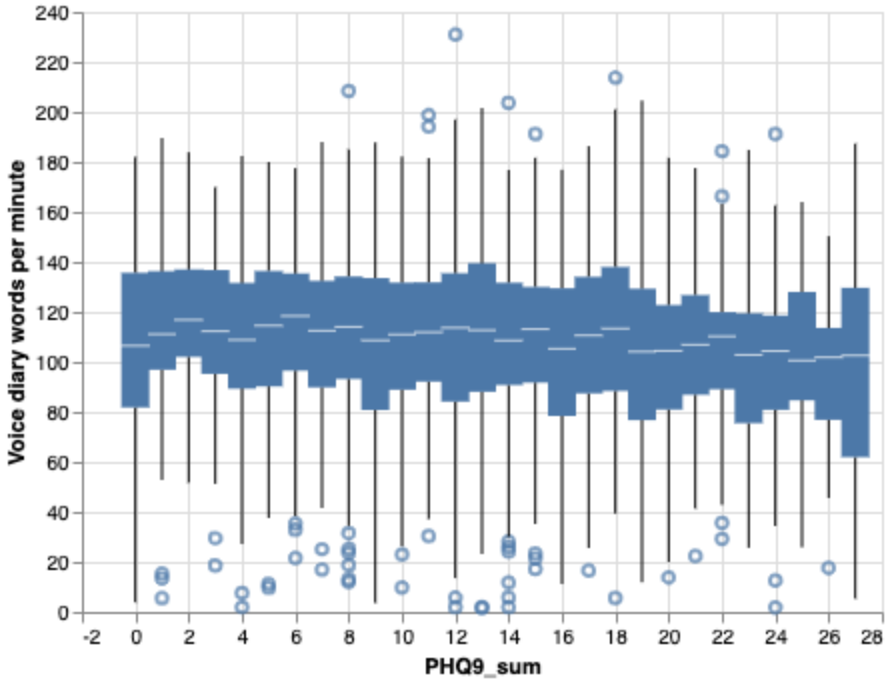

**Figure S2:** For each of the 11 behavioral features that were significantly ( $P \leq 0.001$  adjusted by Benjamini-Hochberg procedure) correlated with PHQ-9 score, we show the PHQ-9 score ranging from 0 to 27 on the x-axis, and the values of the respective behavioral features in a box-and-whiskers format on the y-axis. The white line denotes the median. Circles denote outliers defined as any point more than 1.5 IQRs from the box.
