# Supplementary material for: Toward a Mobile Platform for Real-world Digital Measurement of Depression: User-Centered Design, Data Quality, and Behavioral and Clinical Modeling
Source: PubMed Central journal article supplement (PMC8386379; doi:10.2196/27589), 2021-08-10
Supplement: mental_v8i8e27589_app7.pdf [file mental_v8i8e27589_app7.pdf]

# Feature correlation matrix

Table S1 shows the Pearson product-moment correlation matrix for the 34 behavioral features included in the multivariate logistic regression in the main text. The highest correlation is .78 (between audio system volume and audio notification volume), but the majority of correlations is in the small (up to .30) range.

**Table S1:** Pearson product-moment correlation matrix for the 34 behavioral features.

|                                         | Ambient audio level | Ambient light level | App usage missing | Audio notification volume | Audio system volume | Battery percent | Charging minutes | Communication apps usage | Incoming phone call duration | Location entropy | Location variance | Nearby WiFi networks count | Number of WiFi networks | Outgoing phone call duration | Outgoing text message sentiment score | Phone call count | Phone call ringing until missed minutes | Phone screen on minutes | Physical activity minutes | Reported sleep duration | Reported sleep duration missing | Ring volume | Social app usage | Text message body size | Text message count | Text message emotion count | Time spent at home | Time spent at hospital | Unique location clusters | Voice diary duration | Voice diary pauses duration | Voice diary sentiment | Voice diary words per minute | Wellness app usage |
|-----------------------------------------|---------------------|---------------------|-------------------|---------------------------|---------------------|-----------------|------------------|--------------------------|------------------------------|------------------|-------------------|----------------------------|-------------------------|------------------------------|---------------------------------------|------------------|-----------------------------------------|-------------------------|---------------------------|-------------------------|---------------------------------|-------------|------------------|------------------------|--------------------|----------------------------|--------------------|------------------------|--------------------------|----------------------|-----------------------------|-----------------------|------------------------------|--------------------|
| Ambient audio level                     | 1.00                | -.03                | .00               | .09                       | .06                 | -.14            | -.04             | -.01                     | .00                          | .03              | -.02              | -.10                       | .06                     | -.01                         | .00                                   | .13              | .06                                     | .12                     | .08                       | .00                     | -.01                            | .09         | -.03             | -.06                   | .06                | -.01                       | -.07               | -.05                   | .05                      | -.07                 | -.02                        | -.01                  | -.01                         | -.06               |
| Ambient light level                     | -.03                | 1.00                | .00               | -.04                      | -.05                | -.04            | -.04             | .06                      | .01                          | .23              | .02               | -.10                       | -.07                    | .04                          | .03                                   | .09              | .03                                     | .00                     | .12                       | .00                     | -.02                            | -.07        | -.01             | -.08                   | .05                | .01                        | -.17               | -.01                   | .27                      | -.06                 | .09                         | .01                   | .00                          | .04                |
| App usage missing                       | .00                 | .00                 | 1.00              | -.04                      | -.01                | -.01            | -.05             | .00                      | -.04                         | .03              | -.01              | -.03                       | .00                     | -.03                         | -.04                                  | -.05             | -.06                                    | -.05                    | -.01                      | .05                     | .02                             | -.05        | -.02             | -.01                   | -.01               | -.01                       | -.02               | -.05                   | .01                      | .05                  | -.01                        | -.01                  | -.02                         | -.02               |
| Audio notification volume               | .09                 | -.04                | -.04              | 1.00                      | .78                 | .03             | .06              | .00                      | .09                          | -.10             | -.03              | .02                        | .01                     | .09                          | -.01                                  | .17              | .10                                     | .05                     | -.06                      | -.06                    | -.02                            | .74         | -.04             | .02                    | .02                | .02                        | .15                | -.03                   | -.02                     | .03                  | -.07                        | .02                   | -.04                         | .03                |
| Audio system volume                     | .06                 | -.05                | -.01              | .78                       | 1.00                | .00             | .02              | -.01                     | .07                          | -.16             | -.03              | .01                        | .00                     | .08                          | -.01                                  | .14              | .07                                     | .02                     | -.09                      | -.04                    | -.03                            | .72         | -.06             | .07                    | .01                | -.01                       | .14                | -.01                   | -.07                     | .01                  | -.07                        | .03                   | -.02                         | .01                |
| Battery percent                         | -.14                | -.04                | -.01              | .03                       | .00                 | 1.00            | .37              | -.02                     | -.04                         | .02              | -.01              | .08                        | .01                     | -.05                         | .02                                   | -.17             | -.07                                    | -.07                    | -.03                      | .01                     | .02                             | .00         | -.01             | .02                    | -.06               | .01                        | .05                | .07                    | .03                      | .07                  | -.01                        | -.03                  | -.01                         | .08                |
| Charging minutes                        | -.04                | -.04                | -.05              | .06                       | .02                 | .37             | 1.00             | .02                      | .03                          | .06              | .00               | .08                        | -.08                    | -.01                         | -.02                                  | -.11             | .01                                     | .19                     | -.03                      | -.01                    | -.08                            | .05         | .06              | -.02                   | -.01               | -.02                       | -.03               | -.01                   | .07                      | .07                  | .01                         | -.04                  | -.01                         | .05                |
| Communication apps usage                | -.01                | .06                 | .00               | .00                       | -.01                | -.02            | .02              | 1.00                     | .01                          | .16              | .00               | .06                        | -.01                    | .03                          | .01                                   | .01              | -.01                                    | .10                     | .05                       | -.03                    | -.07                            | -.05        | .61              | -.05                   | .10                | -.03                       | -.03               | .02                    | .14                      | .01                  | -.02                        | -.01                  | .03                          | .54                |
| Incoming phone call duration            | .00                 | .01                 | -.04              | .09                       | .07                 | -.04            | .03              | .01                      | 1.00                         | -.05             | -.02              | .01                        | .04                     | .41                          | .03                                   | .32              | .10                                     | .10                     | .00                       | -.03                    | -.06                            | .11         | -.03             | .10                    | .16                | .03                        | .01                | -.01                   | .03                      | -.03                 | .01                         | .00                   | -.02                         |                    |
| Location entropy                        | .03                 | .23                 | .03               | -.10                      | -.16                | .02             | .06              | .16                      | -.05                         | 1.00             | .07               | -.04                       | -.07                    | .02                          | .06                                   | -.03             | -.06                                    | -.13                    | .27                       | -.02                    | .07                             | -.11        | .20              | -.17                   | .13                | -.03                       | -.44               | .11                    | .66                      | .09                  | .06                         | -.01                  | -.03                         | .12                |
| Location variance                       | -.02                | .02                 | -.01              | -.03                      | -.03                | -.01            | .00              | .00                      | -.02                         | .07              | 1.00              | .00                        | .00                     | -.02                         | .00                                   | -.02             | -.01                                    | -.03                    | .05                       | .01                     | .06                             | -.03        | -.02             | .01                    | -.01               | -.01                       | -.08               | .02                    | .14                      | -.01                 | -.01                        | .03                   | .03                          | -.03               |
| Nearby WiFi networks count              | -.10                | -.10                | -.03              | .02                       | .01                 | .08             | .08              | .06                      | .01                          | -.04             | .00               | 1.00                       | .41                     | -.05                         | .01                                   | -.08             | .00                                     | -.08                    | -.07                      | -.01                    | -.01                            | .03         | .06              | .03                    | -.14               | .00                        | .37                | -.09                   | -.09                     | .03                  | -.07                        | .02                   | -.01                         | .04                |
| Number of WiFi networks                 | .06                 | -.07                | .00               | .01                       | .00                 | .01             | -.08             | -.01                     | .04                          | -.07             | .00               | .41                        | 1.00                    | .00                          | .05                                   | -.04             | -.07                                    | -.08                    | -.02                      | .07                     | .02                             | .00         | -.02             | .00                    | -.07               | .02                        | .18                | -.05                   | -.06                     | .04                  | -.04                        | .03                   | .02                          | -.05               |
| Outgoing phone call duration            | -.01                | .04                 | -.03              | .09                       | .08                 | -.05            | -.01             | .03                      | .41                          | .02              | -.02              | -.05                       | .00                     | 1.00                         | -.01                                  | .55              | .12                                     | .08                     | .12                       | -.01                    | -.03                            | .12         | -.05             | .01                    | .19                | .03                        | .00                | .05                    | .05                      | .03                  | -.01                        | .01                   | -.01                         | -.03               |
| Outgoing text message sentiment score   | .00                 | .03                 | -.04              | -.01                      | -.01                | .02             | -.02             | .01                      | .03                          | .06              | .00               | .01                        | .05                     | -.01                         | 1.00                                  | -.09             | -.04                                    | -.06                    | -.01                      | -.03                    | .02                             | -.01        | .03              | -.05                   | -.01               | .06                        | -.04               | .02                    | .04                      | .01                  | -.03                        | .09                   | .03                          | .02                |
| Phone call count                        | .13                 | .09                 | -.05              | .17                       | .14                 | -.17            | -.11             | .01                      | .32                          | -.03             | -.02              | -.08                       | -.04                    | .55                          | -.09                                  | 1.00             | .46                                     | .13                     | .11                       | -.05                    | .01                             | .19         | -.13             | -.06                   | .17                | -.02                       | -.01               | -.03                   | .10                      | -.02                 | .00                         | -.01                  | -.06                         | -.11               |
| Phone call ringing until missed minutes | .06                 | .03                 | -.06              | .10                       | .07                 | -.07            | .01              | -.01                     | .10                          | -.06             | -.01              | .00                        | -.07                    | .12                          | -.04                                  | .46              | 1.00                                    | .03                     | .03                       | -.02                    | -.02                            | .05         | -.10             | .00                    | .08                | -.04                       | .06                | -.04                   | .03                      | -.05                 | .03                         | -.04                  | -.03                         | -.10               |
| Phone screen on minutes                 | .12                 | .00                 | -.05              | .05                       | .02                 | -.07            | .19              | .10                      | .10                          | -.13             | -.03              | -.08                       | -.08                    | .08                          | -.06                                  | .13              | .03                                     | 1.00                    | .00                       | -.09                    | -.04                            | .05         | .06              | -.04                   | .18                | .02                        | .02                | .04                    | .00                      | .00                  | -.01                        | -.01                  | -.02                         | .00                |

|                                 | Ambient audio level | Ambient light level | App usage missing | Audio notification volume | Audio system volume | Battery percent | Charging minutes | Communication app usage | Incoming phone call duration | Location entropy | Location variance | Nearby WiFi networks | Number of WiFi networks | Outgoing phone call duration | Outgoing text message sent time score | Phone call count | Phone call missed minutes | Phone screen on minutes | Physically active minutes | Reported sleep duration | Reported sleep duration missing | Ring volume | Social apps usage | Text message body size | Text message emoji count | Text message sentiment | Time spent at home | Time spent at hospital | Unique location clusters | Voice diary duration | Voice diary pauses duration | Voice diary sentiment | Voice diary words per minute | Wellness apps usage |
|---------------------------------|---------------------|---------------------|-------------------|---------------------------|---------------------|-----------------|------------------|-------------------------|------------------------------|------------------|-------------------|----------------------|-------------------------|------------------------------|---------------------------------------|------------------|---------------------------|-------------------------|---------------------------|-------------------------|---------------------------------|-------------|-------------------|------------------------|--------------------------|------------------------|--------------------|------------------------|--------------------------|----------------------|-----------------------------|-----------------------|------------------------------|---------------------|
| Physically active minutes       | .08                 | .12                 | -.01              | -.06                      | -.09                | -.03            | -.03             | .05                     | .00                          | .27              | .05               | -.07                 | -.02                    | .12                          | -.01                                  | .11              | .03                       | .00                     | 1.00                      | -.05                    | .06                             | -.08        | .05               | -.06                   | .11                      | -.03                   | -.17               | .12                    | .22                      | -.02                 | .06                         | -.02                  | .03                          | .02                 |
| Reported sleep duration         | .00                 | .00                 | .05               | -.06                      | -.04                | .01             | -.01             | -.03                    | -.03                         | -.02             | .01               | -.01                 | .07                     | -.01                         | -.03                                  | -.05             | -.02                      | -.09                    | -.05                      | 1.00                    | -.04                            | -.07        | .02               | .02                    | .09                      | -.01                   | .01                | .06                    | -.03                     | -.06                 | .01                         | .06                   | .04                          | .00                 |
| Reported sleep duration missing | -.01                | -.02                | .02               | -.02                      | -.03                | .02             | -.08             | -.07                    | -.06                         | .07              | .06               | -.01                 | .02                     | -.03                         | .02                                   | .01              | -.02                      | -.04                    | .06                       | -.04                    | 1.00                            | -.03        | -.04              | -.01                   | .03                      | .03                    | -.10               | .03                    | .05                      | .03                  | .04                         | -.01                  | -.03                         | -.11                |
| Ring volume                     | .09                 | -.07                | -.05              | .74                       | .72                 | .00             | .05              | -.05                    | .11                          | -.11             | -.03              | .03                  | .00                     | .12                          | -.01                                  | .19              | .05                       | .05                     | -.08                      | -.07                    | -.03                            | 1.00        | -.10              | .07                    | .00                      | .02                    | .15                | -.03                   | -.03                     | .05                  | -.09                        | -.02                  | -.05                         | -.02                |
| Social apps usage               | -.03                | -.01                | -.02              | -.04                      | -.06                | -.01            | .06              | .61                     | -.03                         | .20              | -.02              | .06                  | -.02                    | -.05                         | .03                                   | -.13             | -.10                      | .06                     | .05                       | .02                     | -.04                            | -.10        | 1.00              | -.07                   | .14                      | -.03                   | -.07               | .02                    | .07                      | .02                  | -.03                        | .02                   | .07                          | .50                 |
| Text message body size          | -.06                | -.08                | -.01              | .02                       | .07                 | .02             | -.02             | -.05                    | .00                          | -.17             | .01               | .03                  | .00                     | .01                          | -.05                                  | -.06             | .00                       | -.04                    | -.06                      | .02                     | -.01                            | .07         | -.07              | 1.00                   | -.29                     | -.03                   | .16                | .04                    | -.14                     | .08                  | -.08                        | -.02                  | .02                          | -.03                |
| Text message count              | .06                 | .05                 | -.01              | .02                       | .01                 | -.06            | -.01             | .10                     | .10                          | .13              | -.01              | -.14                 | -.07                    | .19                          | -.01                                  | .17              | .08                       | .18                     | .11                       | .09                     | .03                             | .00         | .14               | -.29                   | 1.00                     | .00                    | -.17               | .01                    | .13                      | -.08                 | .03                         | .08                   | .03                          | .05                 |
| Text message emoji count        | -.01                | .01                 | -.01              | .02                       | -.01                | .01             | -.02             | -.03                    | .16                          | -.03             | -.01              | .00                  | .02                     | .03                          | .06                                   | -.02             | -.04                      | .02                     | -.03                      | -.01                    | .03                             | .02         | -.03              | -.03                   | .00                      | 1.00                   | .01                | -.01                   | -.02                     | .03                  | -.02                        | .04                   | .00                          | -.03                |
| Time spent at home              | -.07                | -.17                | -.02              | .15                       | .14                 | .05             | -.03             | -.03                    | .03                          | -.44             | -.08              | .37                  | .18                     | .00                          | -.04                                  | -.01             | .06                       | .02                     | -.17                      | .01                     | -.10                            | .15         | -.07              | .16                    | -.17                     | .01                    | 1.00               | -.05                   | -.26                     | -.03                 | -.04                        | -.01                  | .00                          | .01                 |
| Time spent at hospital          | -.05                | -.01                | -.05              | -.03                      | -.01                | .07             | -.01             | .02                     | .01                          | .11              | .02               | -.09                 | -.05                    | .05                          | .02                                   | -.03             | -.04                      | .04                     | .12                       | .06                     | .03                             | -.03        | .02               | .04                    | .01                      | -.01                   | -.05               | 1.00                   | .07                      | -.01                 | .01                         | -.02                  | .01                          | .04                 |
| Unique location clusters        | .05                 | .27                 | .01               | -.02                      | -.07                | .03             | .07              | .14                     | -.01                         | .66              | .14               | -.09                 | -.06                    | .05                          | .04                                   | .10              | .03                       | .00                     | .22                       | -.03                    | .05                             | -.03        | .07               | -.14                   | .13                      | -.02                   | -.26               | .07                    | 1.00                     | .04                  | .03                         | .03                   | -.03                         | .07                 |
| Voice diary duration            | -.07                | -.06                | .05               | .03                       | .01                 | .07             | .07              | .01                     | .03                          | .09              | -.01              | .03                  | .04                     | .03                          | .01                                   | -.02             | -.05                      | .00                     | -.02                      | -.06                    | .03                             | .05         | .02               | .08                    | -.08                     | .03                    | -.03               | -.01                   | .04                      | 1.00                 | -.02                        | -.09                  | -.38                         | -.01                |
| Voice diary pauses duration     | -.02                | .09                 | -.01              | -.07                      | -.07                | -.01            | .01              | -.02                    | -.03                         | .06              | -.01              | -.07                 | -.04                    | -.01                         | -.03                                  | .00              | .03                       | -.01                    | .06                       | .01                     | .04                             | -.09        | -.03              | -.08                   | .03                      | -.02                   | -.04               | .01                    | .03                      | -.02                 | 1.00                        | -.03                  | -.27                         | -.05                |
| Voice diary sentiment           | -.01                | .01                 | -.01              | .02                       | .03                 | -.03            | -.04             | -.01                    | .01                          | -.01             | .03               | .02                  | .03                     | .01                          | .09                                   | -.01             | -.04                      | -.01                    | -.02                      | .06                     | -.01                            | -.02        | .02               | -.02                   | .08                      | .04                    | -.01               | -.02                   | .03                      | -.09                 | -.03                        | 1.00                  | .09                          | -.03                |
| Voice diary words per minute    | -.01                | .00                 | -.02              | -.04                      | -.02                | -.01            | -.01             | .03                     | .00                          | -.03             | .03               | -.01                 | .02                     | -.01                         | .03                                   | -.06             | -.03                      | -.02                    | .03                       | .04                     | -.03                            | -.05        | .07               | .02                    | .03                      | .00                    | .00                | .01                    | -.03                     | -.38                 | -.27                        | .09                   | 1.00                         | .06                 |
| Wellness apps usage             | -.06                | .04                 | -.02              | .03                       | .01                 | .08             | .05              | .54                     | -.02                         | .12              | -.03              | .04                  | -.05                    | -.03                         | .02                                   | -.11             | -.10                      | .00                     | .02                       | .00                     | -.11                            | -.02        | .50               | -.03                   | .05                      | -.03                   | .01                | .04                    | .07                      | -.01                 | -.05                        | -.03                  | .06                          | 1.00                |
